# Supplementary material for: GelJ – a tool for analyzing DNA fingerprint gel images
Source: PubMed Central journal article supplement (PMC4549892; doi:10.1186/s12859-015-0703-0), 2015-08-26

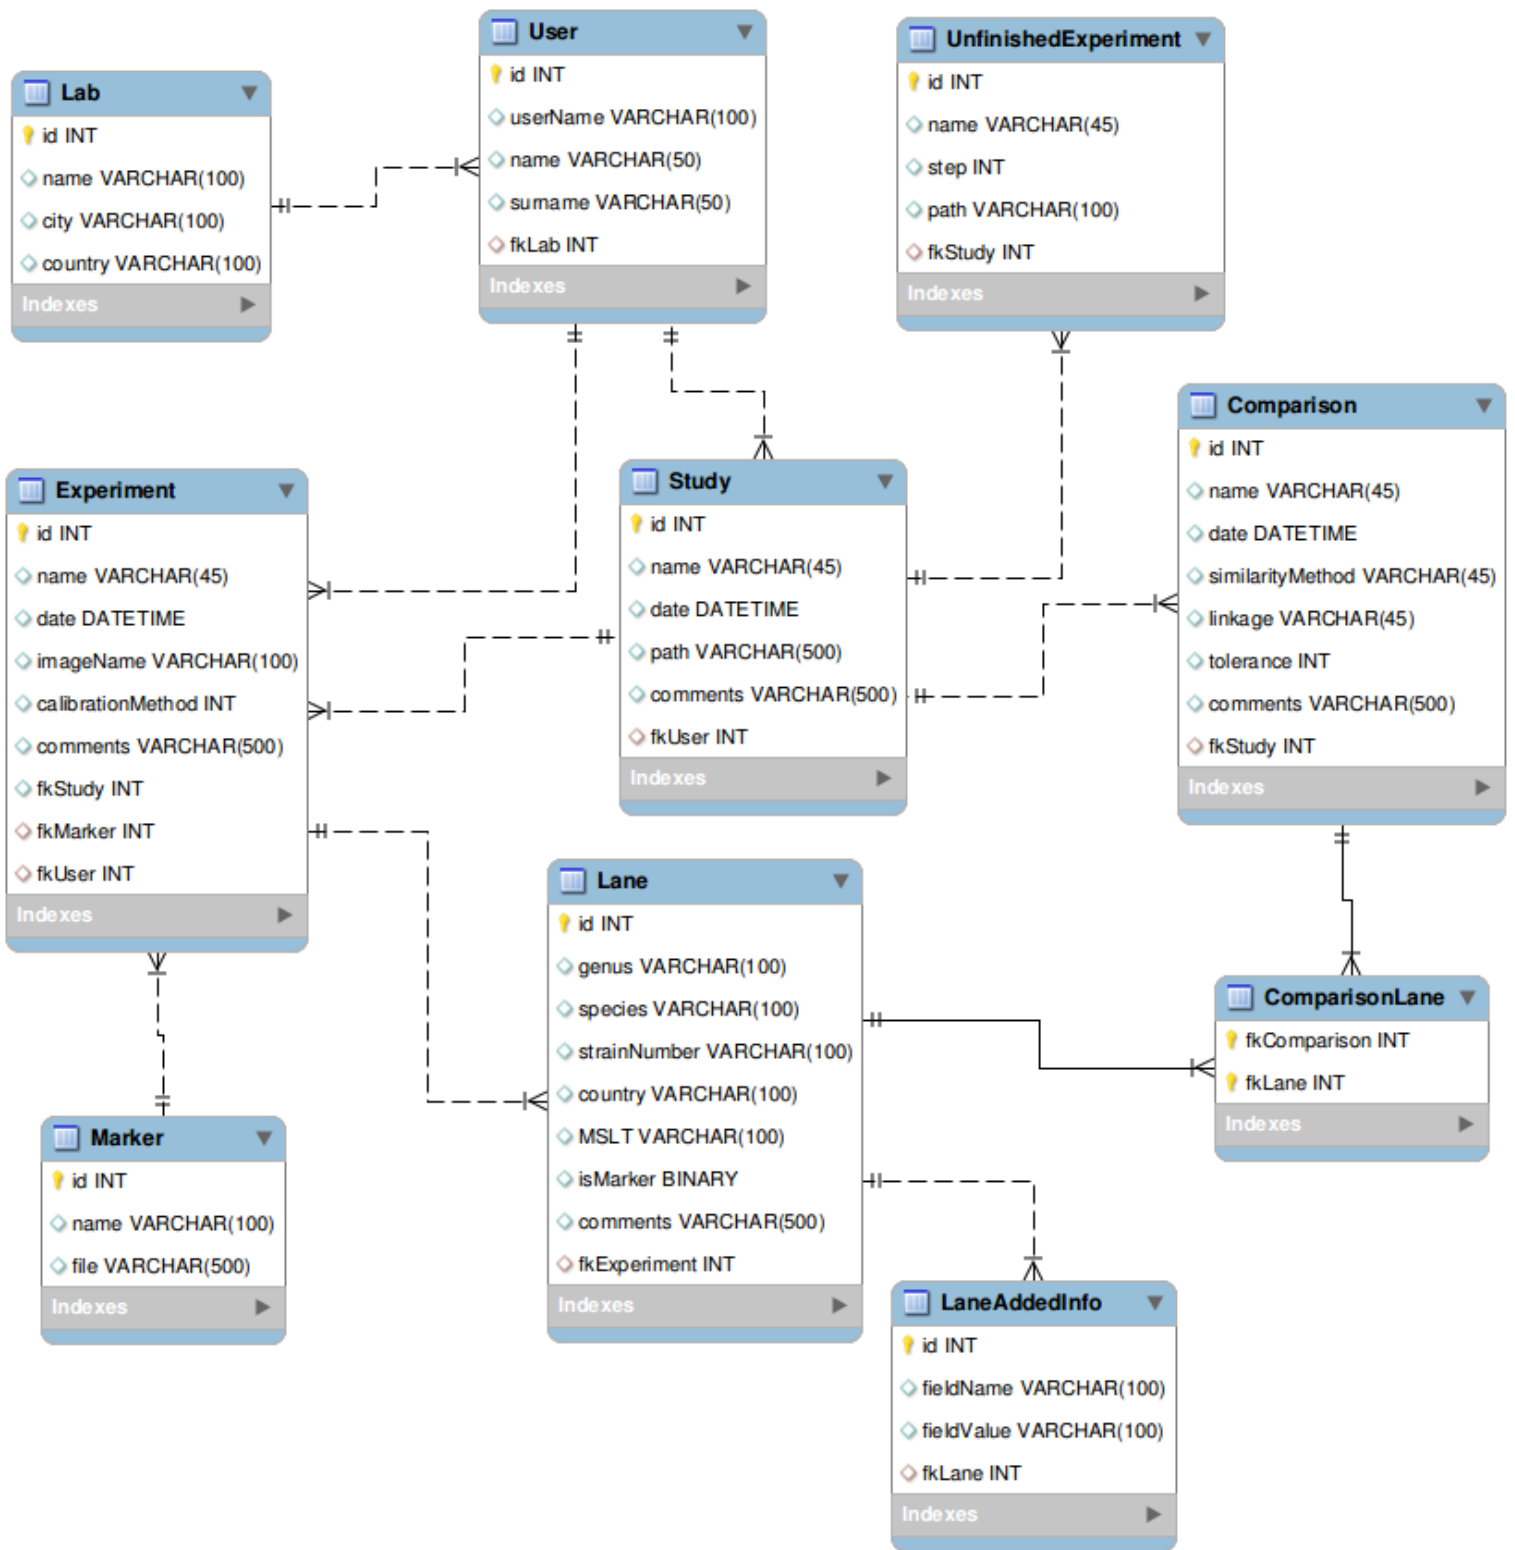

Supplement: 12859_2015_703_MOESM1_ESM.pdf [file 12859_2015_703_MOESM1_ESM.pdf]
