# Supplementary material for: GelJ – a tool for analyzing DNA fingerprint gel images
Source: PubMed Central journal article supplement (PMC4549892; doi:10.1186/s12859-015-0703-0), 2015-08-26
Supplement: 12859_2015_703_MOESM3_ESM.pdf [file 12859_2015_703_MOESM3_ESM.pdf]

# Features included in GelJ

In this document, we include the complete list of features available in GelJ.

---

| General features      |                                                                                                 |
|-----------------------|-------------------------------------------------------------------------------------------------|
| Criteria              | Description                                                                                     |
| Free                  | GelJ is an open-source and free software.                                                       |
| Operating System      | GelJ is platform-independent.                                                                   |
| Format support        | GelJ works with all the formats supported by ImageJ: TIFF, JPG, PNG, GIF, BMP, and many others. |
| Hardware requirements | There is not any special hardware requirement to run GelJ.                                      |

---

Table 1: *General features of GelJ.*

---

| Pre-Processing         |                                                                                                                          |
|------------------------|--------------------------------------------------------------------------------------------------------------------------|
| Criteria               | Description                                                                                                              |
| Image Editing          | GelJ supports several operations to edit the image: crop, rotate, flip, and invert.                                      |
| Contrast/Brightness    | The user of GelJ can adjust the contrast and brightness of images both manually and automatically.                       |
| Gamma correction       | GelJ supports gamma correction.                                                                                          |
| Background subtraction | GelJ can subtract the background of the image using the rolling disk method.                                             |
| Filtering              | GelJ supports several filters to remove the noise from an image: median, mean, Gaussian, minimum, maximum, and variance. |

---

Table 2: *Pre-processing features of GelJ.*

| Lane segmentation      |                                                                                                                                   |
|------------------------|-----------------------------------------------------------------------------------------------------------------------------------|
| Criteria               | Description                                                                                                                       |
| Lane creation          | GelJ automatically detects the lanes of a gel-image without any user input.                                                       |
| Add/Delete lanes       | The user can manually add and remove lanes.                                                                                       |
| Lane edition           | The user can manually edit the thickness and position of lanes.                                                                   |
| Curved lanes           | The lanes detected in GelJ can be either straight or curved.                                                                      |
| Different thickness    | The lanes detected in GelJ can have different thickness.                                                                          |
| Background subtraction | The user can subtract background from individual lanes. The user can also adjust the brightness and contrast of individual lanes. |

Table 3: *Lane segmentation features of GelJ.*

| Band detection    |                                                                                                                                                                    |
|-------------------|--------------------------------------------------------------------------------------------------------------------------------------------------------------------|
| Criteria          | Description                                                                                                                                                        |
| Band creation     | GelJ automatically detects the bands of a gel-image.                                                                                                               |
| Add/Delete bands  | The user can manually add and remove bands.                                                                                                                        |
| Threshold         | GelJ provides two kinds of threshold to detect bands in an image: a global threshold, and a lane-by-lane threshold.                                                |
| Histogram display | GelJ can show the histogram for each lane of the image. The histogram is synchronised with the image in such a way that the user can add bands from the histogram. |
| Undo support      | GelJ offers the undo/redo functionality to pick bands.                                                                                                             |

Table 4: *Band detection features of GelJ.*

| Normalisation                        |                                                                                                                                                                                                                                                                                                                                                                                                                                                                    |
|--------------------------------------|--------------------------------------------------------------------------------------------------------------------------------------------------------------------------------------------------------------------------------------------------------------------------------------------------------------------------------------------------------------------------------------------------------------------------------------------------------------------|
| Criteria                             | Description                                                                                                                                                                                                                                                                                                                                                                                                                                                        |
| Loading Standards<br>Migration model | Reference systems can be saved and loaded in GelJ. GelJ offers 24 methods to compute the migration model: 1st-8th degree polynomial, power, power (linear regression), exponential, exponential (linear regression), exponential with offset, exponential recovery, exponential recovery (no offset), logarithmic, $y = a + b \times \ln(x - c)$ , Gaussian, Gaussian (no offset), Rodbard, Rodbard (NIH Image), Inverse Rodbard, Gamma variate, Chapman-Richards. |

Table 5: *Normalisation features of GelJ.*

| Fingerprint Comparison |                                                                                                                                                                                                                                                                                                                                  |
|------------------------|----------------------------------------------------------------------------------------------------------------------------------------------------------------------------------------------------------------------------------------------------------------------------------------------------------------------------------|
| Criteria               | Description                                                                                                                                                                                                                                                                                                                      |
| Similarity methods     | GelJ supports several methods to compute the similarity between two lanes. Band-based: Dice, Jaccard, Ochiai, Jeffrey's X, and band difference. Curve-based: Pearson correlation, Cosine coefficient, Euclidean distance, and Manhattan distance.                                                                                |
| Tolerance              | GelJ allows the user to modify the tolerance for band matching in the case of band-based methods.                                                                                                                                                                                                                                |
| Dendrogram methods     | GelJ supports several methods to create dendrograms: UPGMA, UPGMC, single linkage, complete linkage, mean linkage and ward.                                                                                                                                                                                                      |
| Dendrogram output      | GelJ offers several options to show the dendrogram: only the dendrogram, the dendrogram and the image of each lane, the dendrogram and the band position of each lane, and the dendrogram with a combination of the image and bands of each lane. Additionally, for each lane the user can select the information that is shown. |
| Similarity matrix      | GelJ can show the similarity matrix used for the dendrogram generation.                                                                                                                                                                                                                                                          |

Table 6: *Fingerprint comparison features of GelJ.*

| Additional features |                                                                           |
|---------------------|---------------------------------------------------------------------------|
| Criteria            | Description                                                               |
| Database            | GelJ supports the storage of lanes and information in a database.         |
| Save                | GelJ can save experiments in an intermediate step for further processing. |
| Export              | GelJ results can be exported.                                             |
| Smiling             | GelJ supports smiling correction.                                         |
| Annotation          | GelJ allows the annotation of the image.                                  |
| Backups             | GelJ can create backups of the whole database.                            |
| Users               | GelJ provides a user-management system.                                   |
| Search              | Given a lane, GelJ can search similar lanes across the whole database.    |

Table 7: *Criteria related to additional features provided by GelJ.*
