# Supplementary material for: GelJ – a tool for analyzing DNA fingerprint gel images
Source: PubMed Central journal article supplement (PMC4549892; doi:10.1186/s12859-015-0703-0), 2015-08-26
Supplement: 12859_2015_703_MOESM4_ESM.pdf [file 12859_2015_703_MOESM4_ESM.pdf]

# Comparison of GelJ with other tools

## **Abstract**

In this document, we include a comparison of GelJ with 7 tools (Gel-ComparII, GelClust, GelQuant Pro, ImageQuant, Phoretix 1D Pro, Pyelph, and TotalLab). Table 8 compares some general features of these tools, Tables 9– 16 show the differences among the tools regarding the 5 stages involved in the comparison of samples from gel-images. Table 17 summarises the advanced features that are included in these tools but that are not strictly necessary for the analysis of gel-images.

| Feature       | GelJ        | GelComparII | GelClust | GelQuant Pro | ImageQuant | Phoretix 1D Pro | Pyelph      | TotalLab |
|---------------|-------------|-------------|----------|--------------|------------|-----------------|-------------|----------|
| Free          | ✓           |             | ✓        |              |            |                 | ✓           |          |
| Demo version  |             | ✓           |          | ✓            | ✓          | ✓               |             | ✓        |
| Platform      | Independent | Windows     | Windows  | Windows      | Windows    | Windows         | Independent | Windows  |
| TIFF          | ✓           | ✓           | ✓        | ✓            | ✓          | ✓               | ✓           | ✓        |
| JPG           | ✓           | ✓           | ✓        | ✓            | ✓          | ✓               | ✓           | ✓        |
| PNG           | ✓           | ✓           | ✓        | ✓            | ✓          | ✓               | ✓           | ✓        |
| other formats | ✓           | ✓           | ✓        | ✓            | ✓          | ✓               | ✓           | ✓        |

Table 8: *General features.*

| Feature                | GelJ | GelComparII | GelClust | GelQuant Pro | ImageQuant | Phoretix 1D Pro | Pyelph | TotalLab |
|------------------------|------|-------------|----------|--------------|------------|-----------------|--------|----------|
| Crop                   | ✓    | ✓           |          | ✓            | ✓          | ✓               | ✓      | ✓        |
| Rotate                 | ✓    | ✓           |          | ✓            | ✓          | ✓               | ✓      | ✓        |
| Flip                   | ✓    | ✓           |          | ✓            | ✓          | ✓               | ✓      | ✓        |
| Invert                 | ✓    | ✓           |          |              |            |                 |        |          |
| Other operations       | ✓    | ✓           |          |              |            |                 |        |          |
| Manual B&C             | ✓    | ✓           |          | ✓            | ✓          | ✓               | ✓      | ✓        |
| Auto adjust B&C        | ✓    | ✓           |          | ✓            | ✓          | ✓               | ✓      | ✓        |
| Gamma correction       | ✓    |             |          | ✓            |            |                 |        |          |
| Background subtraction | ✓    | ✓           |          | ✓            | ✓          | ✓               | ✓      | ✓        |
| Filtering              | ✓    |             |          | ✓            | ✓          | ✓               | ✓      | ✓        |

Table 9: *Pre-processing features.*

| Feature                 | GelJ | GelComparII | GelClust | GelQuant Pro | ImageQuant | Phoretix 1D Pro | Pyelph | TotalLab |
|-------------------------|------|-------------|----------|--------------|------------|-----------------|--------|----------|
| Automatic lane creation | ✓    | ✓           | ✓        | ✓            | ✓          | ✓               | ✓      | ✓        |
| Add – delete lanes      | ✓    | ✓           | ✓        | ✓            | ✓          | ✓               | ✓      | ✓        |
| Lane edition            | ✓    | ✓           | ✓        | ✓            | ✓          | ✓               | ✓      | ✓        |
| Curved lanes            | ✓    | ✓           |          | ✓            | ✓          | ✓               | ✓      | ✓        |
| Different thickness     | ✓    | ✓           | ✓        | ✓            | ✓          | ✓               | ✓      | ✓        |
| Background subtraction  | ✓    | ✓           | ✓        | ✓            | ✓          | ✓               | ✓      | ✓        |

Table 10: *Lane-detection features.*

| Feature           | GelJ                                                                                                            | GelComparII                                                                   | GelClust | GelQuant Pro                                                                 | ImageQuant                                                                   | Phoretix Pro                                                                 | 1D | Pyelph      | TotalLab                                                                     |
|-------------------|-----------------------------------------------------------------------------------------------------------------|-------------------------------------------------------------------------------|----------|------------------------------------------------------------------------------|------------------------------------------------------------------------------|------------------------------------------------------------------------------|----|-------------|------------------------------------------------------------------------------|
| Load ref. markers | ✓                                                                                                               | ✓                                                                             | ✓        | ✓                                                                            | ✓                                                                            | ✓                                                                            | ✓  | ✓           | ✓                                                                            |
| Methods           | 1st - 8th degree curve, power, exponential, logarithmic, Gaussian, Rodbard, Inverse Rodbard, Gamma variate, ... | 1st - 3rd degree curve, Cubic spline, Pole fit (combined with log dependency) |          | Logarithmic, quadratic, cubic spline, linear log, linear, 1st order Lagrange | Logarithmic, quadratic, cubic spline, linear log, linear, 1st order Lagrange | Logarithmic, quadratic, cubic spline, linear log, linear, 1st order Lagrange |    | Logarithmic | Logarithmic, quadratic, cubic spline, linear log, linear, 1st order Lagrange |

Table 11: Normalisation features.

| Feature                      | GelJ | GelComparII | GelClust | GelQuant Pro | ImageQuant | Phoretix 1D | Pro | Pyelph | TotalLab |
|------------------------------|------|-------------|----------|--------------|------------|-------------|-----|--------|----------|
| Automatic band detection     | ✓    | ✓           | ✓        | ✓            | ✓          | ✓           | ✓   | ✓      | ✓        |
| Band picking                 | ✓    | ✓           | ✓        | ✓            | ✓          | ✓           | ✓   | ✓      | ✓        |
| Threshold for band detection | ✓    | ✓           | ✓        | ✓            | ✓          | ✓           | ✓   | ✓      | ✓        |
| Histogram display            | ✓    | ✓           | ✓        | ✓            | ✓          | ✓           | ✓   | ✓      | ✓        |

3

Table 12: Band-detection features.

| Method                      | GelJ | GelComparII | GelClust | GelQuant Pro | ImageQuant | Phoretix 1D | Pro | Pyelph | TotalLab |
|-----------------------------|------|-------------|----------|--------------|------------|-------------|-----|--------|----------|
| Dice                        | ✓    | ✓           | ✓        | ✓            | ✓          | ✓           | ✓   | ✓      | ✓        |
| Jaccard                     | ✓    | ✓           | ✓        |              |            |             |     |        |          |
| Ochiai                      | ✓    | ✓           |          |              |            |             |     |        |          |
| Band difference             | ✓    | ✓           |          |              |            |             |     |        |          |
| <a href="#">Jeffrey's X</a> | ✓    | ✓           |          |              |            |             |     |        |          |
| Tolerance for band matching | ✓    | ✓           | ✓        |              |            |             |     | ✓      | ✓        |

Table 13: Band-based methods for similarity.

| Method                    | GelJ | GelComparII | GelClust | GelQuant Pro | ImageQuant | Phoretix 1D | Pro | Pyelph | TotalLab |
|---------------------------|------|-------------|----------|--------------|------------|-------------|-----|--------|----------|
| Pearson                   | ✓    | ✓           | ✓        |              |            |             |     |        |          |
| Cosine                    | ✓    | ✓           |          |              |            |             |     |        |          |
| Euclidean                 | ✓    |             |          |              |            |             |     |        |          |
| <a href="#">Manhattan</a> | ✓    |             |          |              |            |             |     |        |          |

Table 14: Curve-based methods for similarity.

| Method              | GelJ | GelComparII | GelClust | GelQuant Pro | ImageQuant | Phoretix 1D Pro | Pyelph | TotalLab |
|---------------------|------|-------------|----------|--------------|------------|-----------------|--------|----------|
| UPGMA               | ✓    | ✓           | ✓        | ✓            | ✓          | ✓               | ✓      | ✓        |
| Single linkage      | ✓    | ✓           |          |              |            | ✓               | ✓      |          |
| Neighbour joining   |      | ✓           | ✓        | ✓            | ✓          |                 | ✓      | ✓        |
| Complete linkage    | ✓    | ✓           |          |              |            | ✓               | ✓      |          |
| Ward                | ✓    | ✓           |          |              |            | ✓               |        |          |
| <b>UPGMC</b>        | ✓    |             |          |              |            |                 |        |          |
| <b>Mean linkage</b> | ✓    |             |          |              |            |                 |        |          |
| <b>WPGMA</b>        |      |             |          |              | ✓          |                 | ✓      |          |

Table 15: *Clustering methods.*

| Output                        | GelJ | GelComparII | GelClust | GelQuant Pro | ImageQuant | Phoretix 1D Pro | Pyelph | TotalLab |
|-------------------------------|------|-------------|----------|--------------|------------|-----------------|--------|----------|
| Dendrogram                    | ✓    | ✓           | ✓        | ✓            | ✓          | ✓               | ✓      | ✓        |
| Dendrogram +<br>Lanes         | ✓    | ✓           | ✓        | ✓            | ✓          | ✓               |        | ✓        |
| Dendrogram +<br>Bands         | ✓    | ✓           |          |              |            |                 |        |          |
| Dendrogram +<br>Lanes + Bands | ✓    | ✓           |          |              |            |                 |        |          |
| Similarity Matrix             | ✓    | ✓           |          |              |            | ✓               |        |          |

Table 16: *Output.*

| Feature                             | GelJ | GelComparII | GelClust | GelQuant Pro | ImageQuant | Phoretix 1D Pro | Pyelph | TotalLab |
|-------------------------------------|------|-------------|----------|--------------|------------|-----------------|--------|----------|
| Database support                    | ✓    | ✓           |          |              |            | ✓               |        |          |
| Provide reports                     |      | ✓           |          | ✓            | ✓          | ✓               |        | ✓        |
| Save experiments                    | ✓    | ✓           |          |              |            |                 |        |          |
| Export                              | ✓    | ✓           |          | ✓            | ✓          | ✓               | ✓      | ✓        |
| Smiling correction                  | ✓    | ✓           | ✓        |              | ✓          | ✓               |        | ✓        |
| 3D                                  |      |             | ✓        |              | ✓          | ✓               |        | ✓        |
| Annotation                          | ✓    |             |          |              | ✓          | ✓               |        | ✓        |
| GLP/CFR<br>21 Part 11<br>compliance |      | ✓           |          |              |            |                 |        |          |

Table 17: *Additional features.*
